# Supplementary material for: Organelle inheritance and genome architecture variation in isogamous brown algae
Source: PubMed Central journal article supplement (PMC7005149; doi:10.1038/s41598-020-58817-7), 2020-02-06
Supplement: 41598_2020_58817_MOESM1_ESM.pdf [file 41598_2020_58817_MOESM1_ESM.pdf]

## **Organelle inheritance and genome architecture variation in isogamous and anisogamous brown algae**

Ji Won Choi<sup>1</sup>, Louis Graf<sup>1</sup>, Akira F. Peters<sup>2</sup>, J. Mark Cock<sup>3</sup>, Koki Nishitsuji<sup>4</sup>, Asuka Arimoto<sup>4</sup>, Eiichi Shoguchi<sup>4</sup>, Chikako Nagasato<sup>5</sup>, Chang Geun Choi<sup>6</sup>, and Hwan Su Yoon<sup>1\*</sup>

<sup>1</sup>Department of Biological Sciences, Sungkyunkwan University, Suwon 16419, Korea

<sup>2</sup>Bezhin Rosko, 29250 Santec, France

<sup>3</sup>Algal Genetics Group, UMR 8227, CNRS, Sorbonne Universités, UPMC, Station Biologique Roscoff, CS 90074, 29688 Roscoff, France

<sup>4</sup>Marine Genomics Unit, Okinawa Institute of Science and Technology Graduate University, Onna, Okinawa 904-0495, Japan

<sup>5</sup>Muroran Marine Station, Field Science Center for Northern Biosphere, Hokkaido University Muroran 051-0013, Japan

<sup>6</sup>Department of Ecological Engineering, Pukyong National University, Busan 48513, Korea

\*Corresponding author

E-mail: hsyoon2011@skku.edu

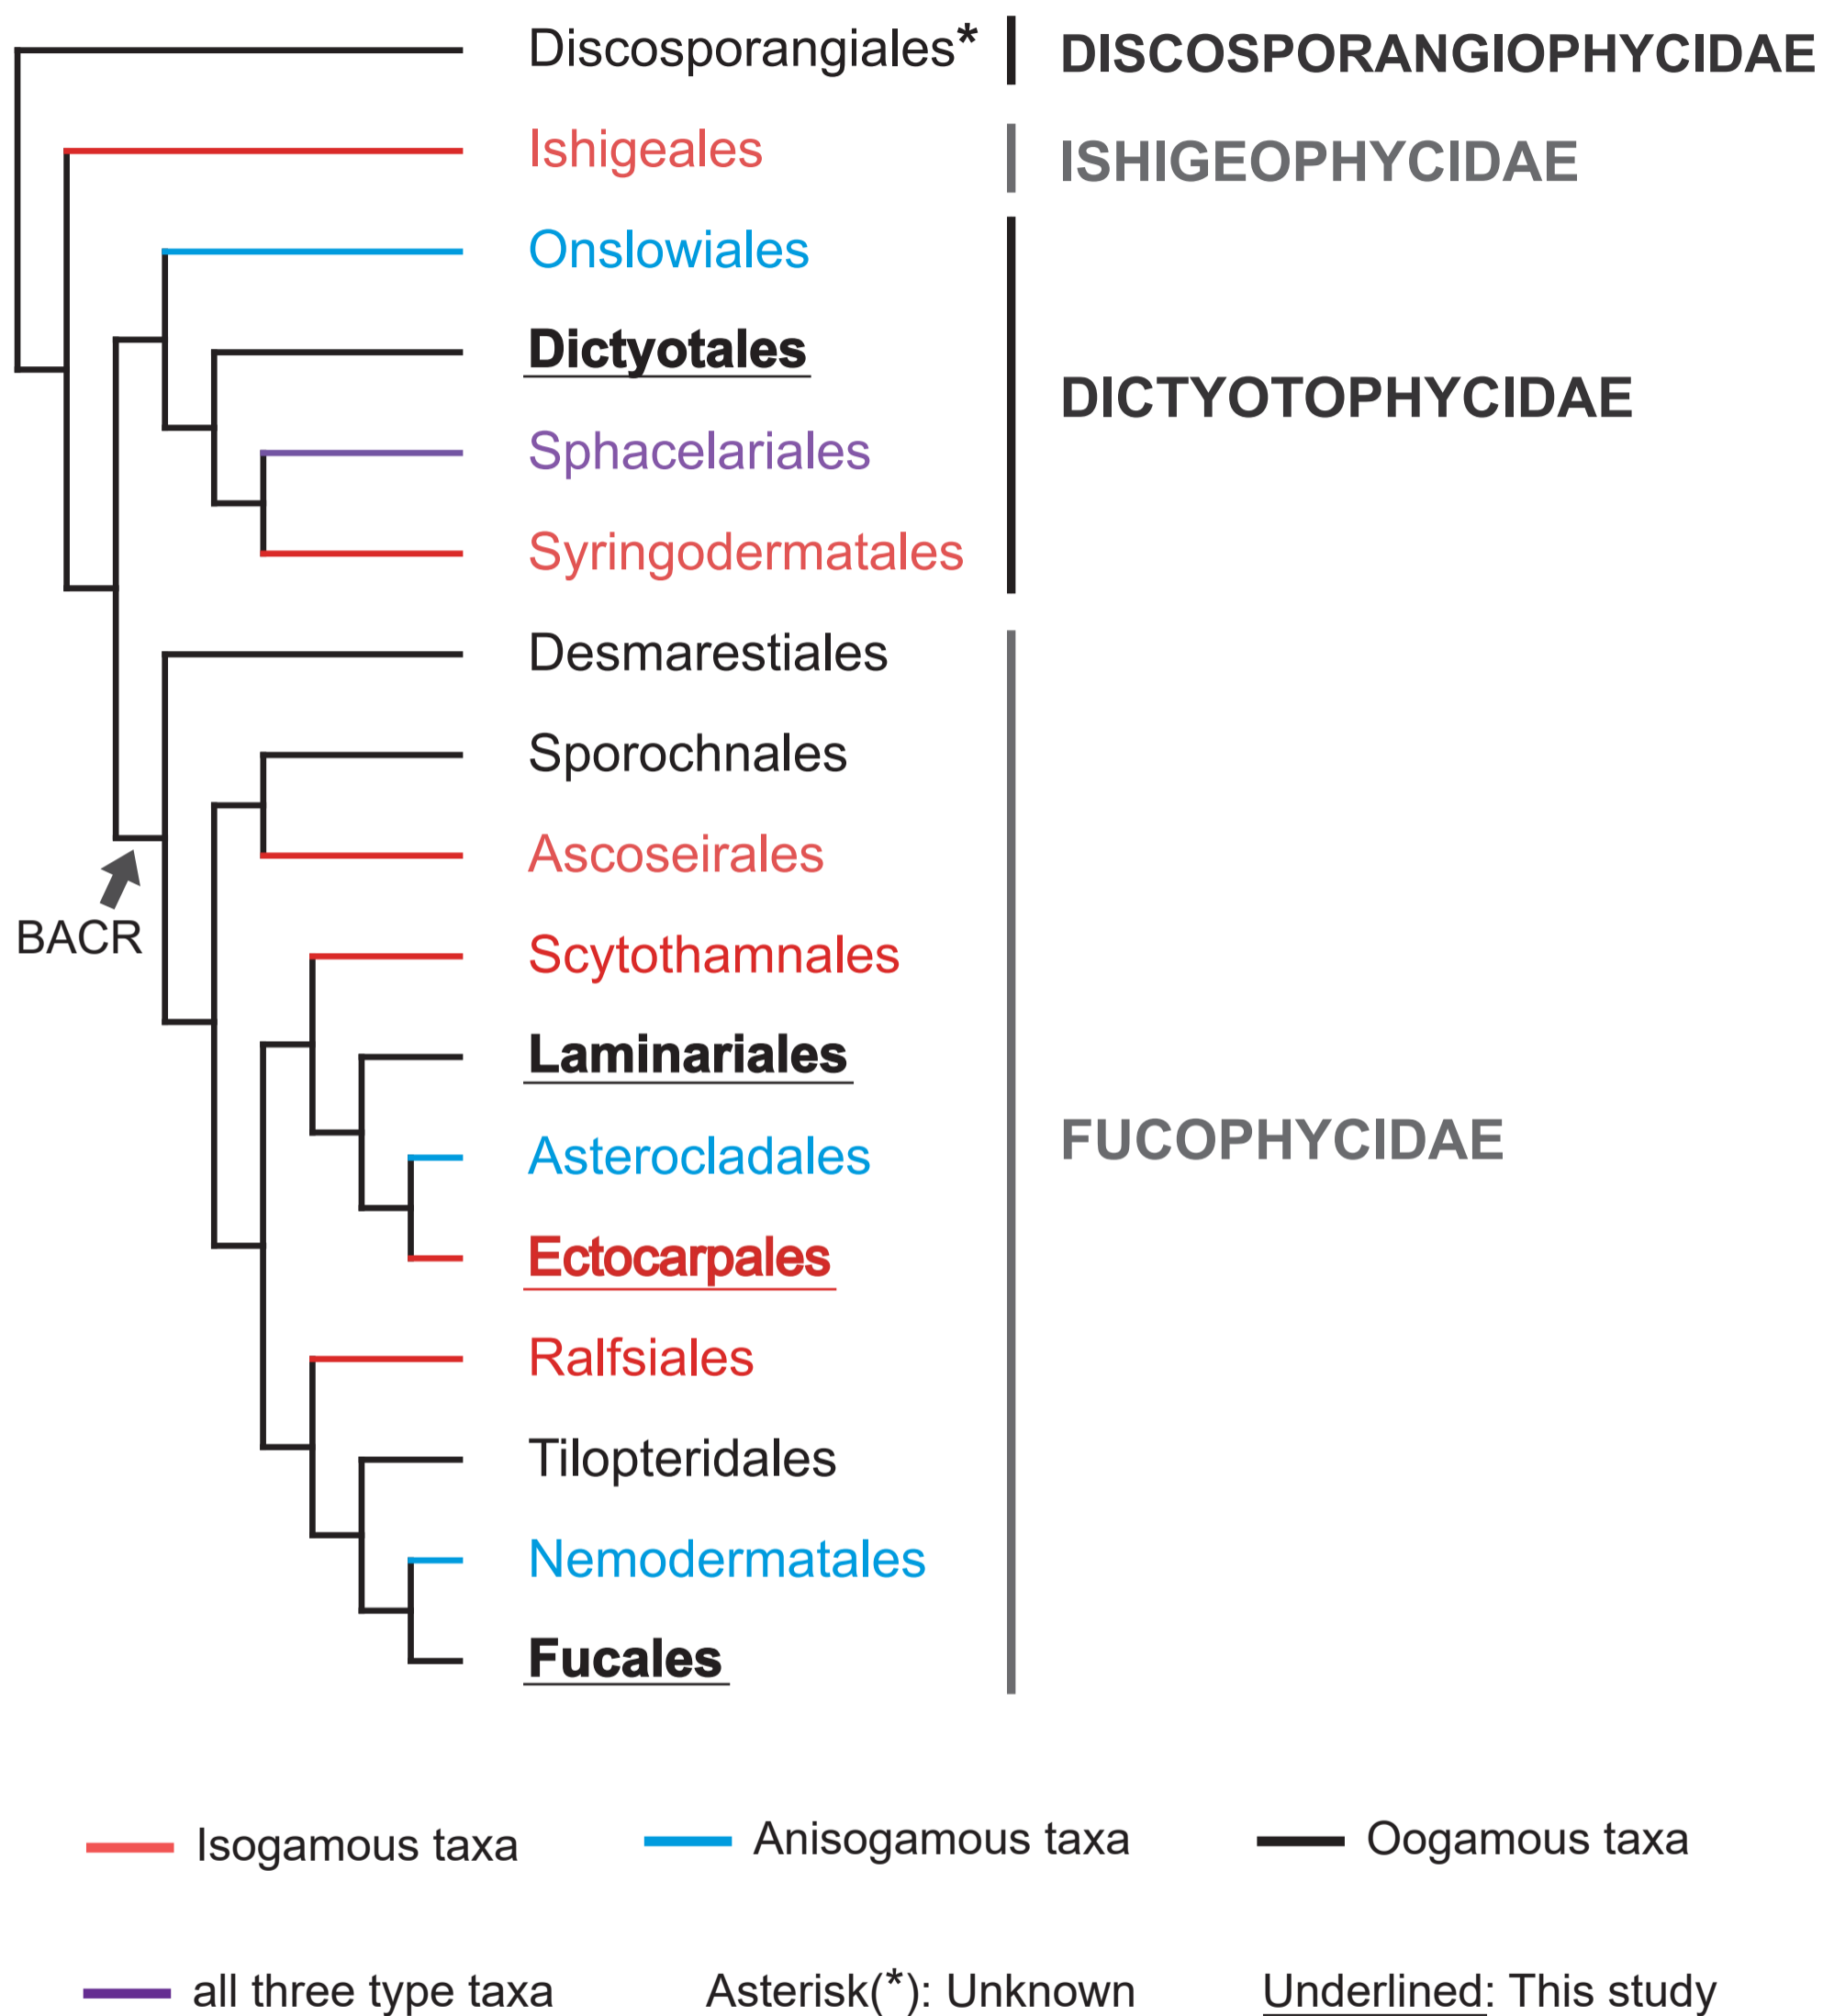

Fig. S1. Classification of four subclasses of Phaeophyceae and the type of fertilization at the order level. (BACR: Brown algal crown radiation)

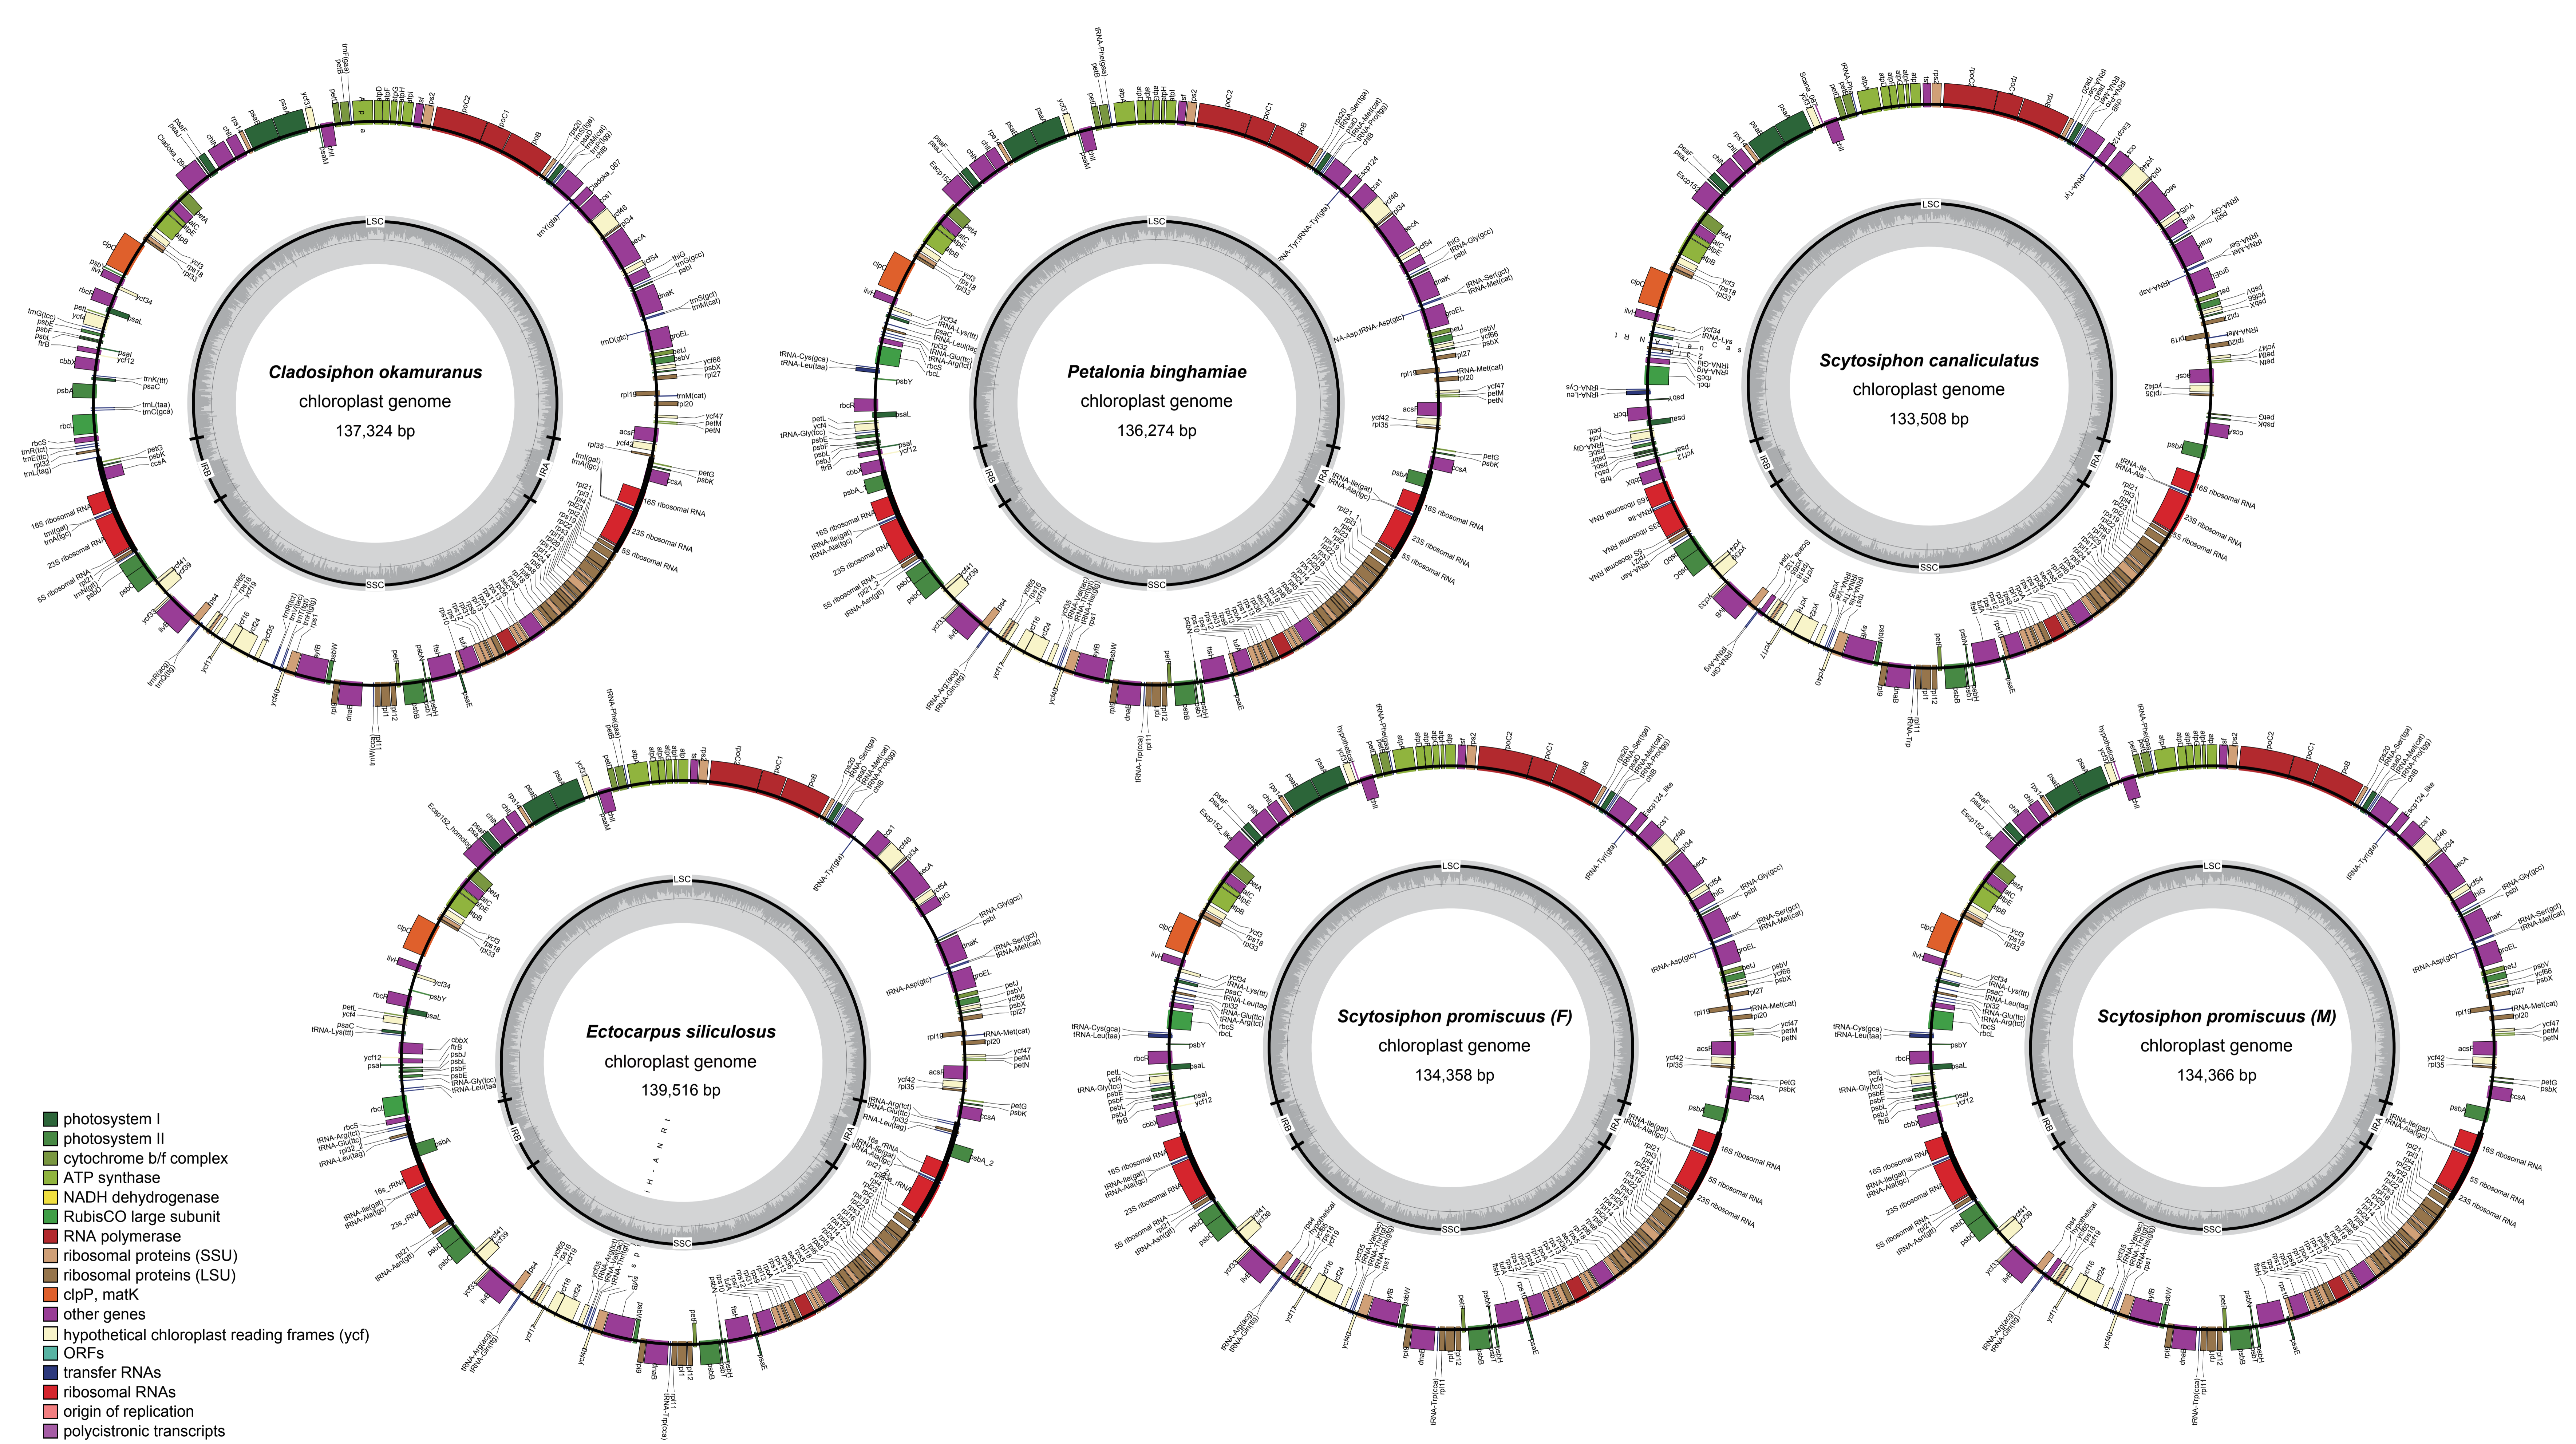

Fig. S2. Circular maps of the plastid genomes of four Ectocarpales species.

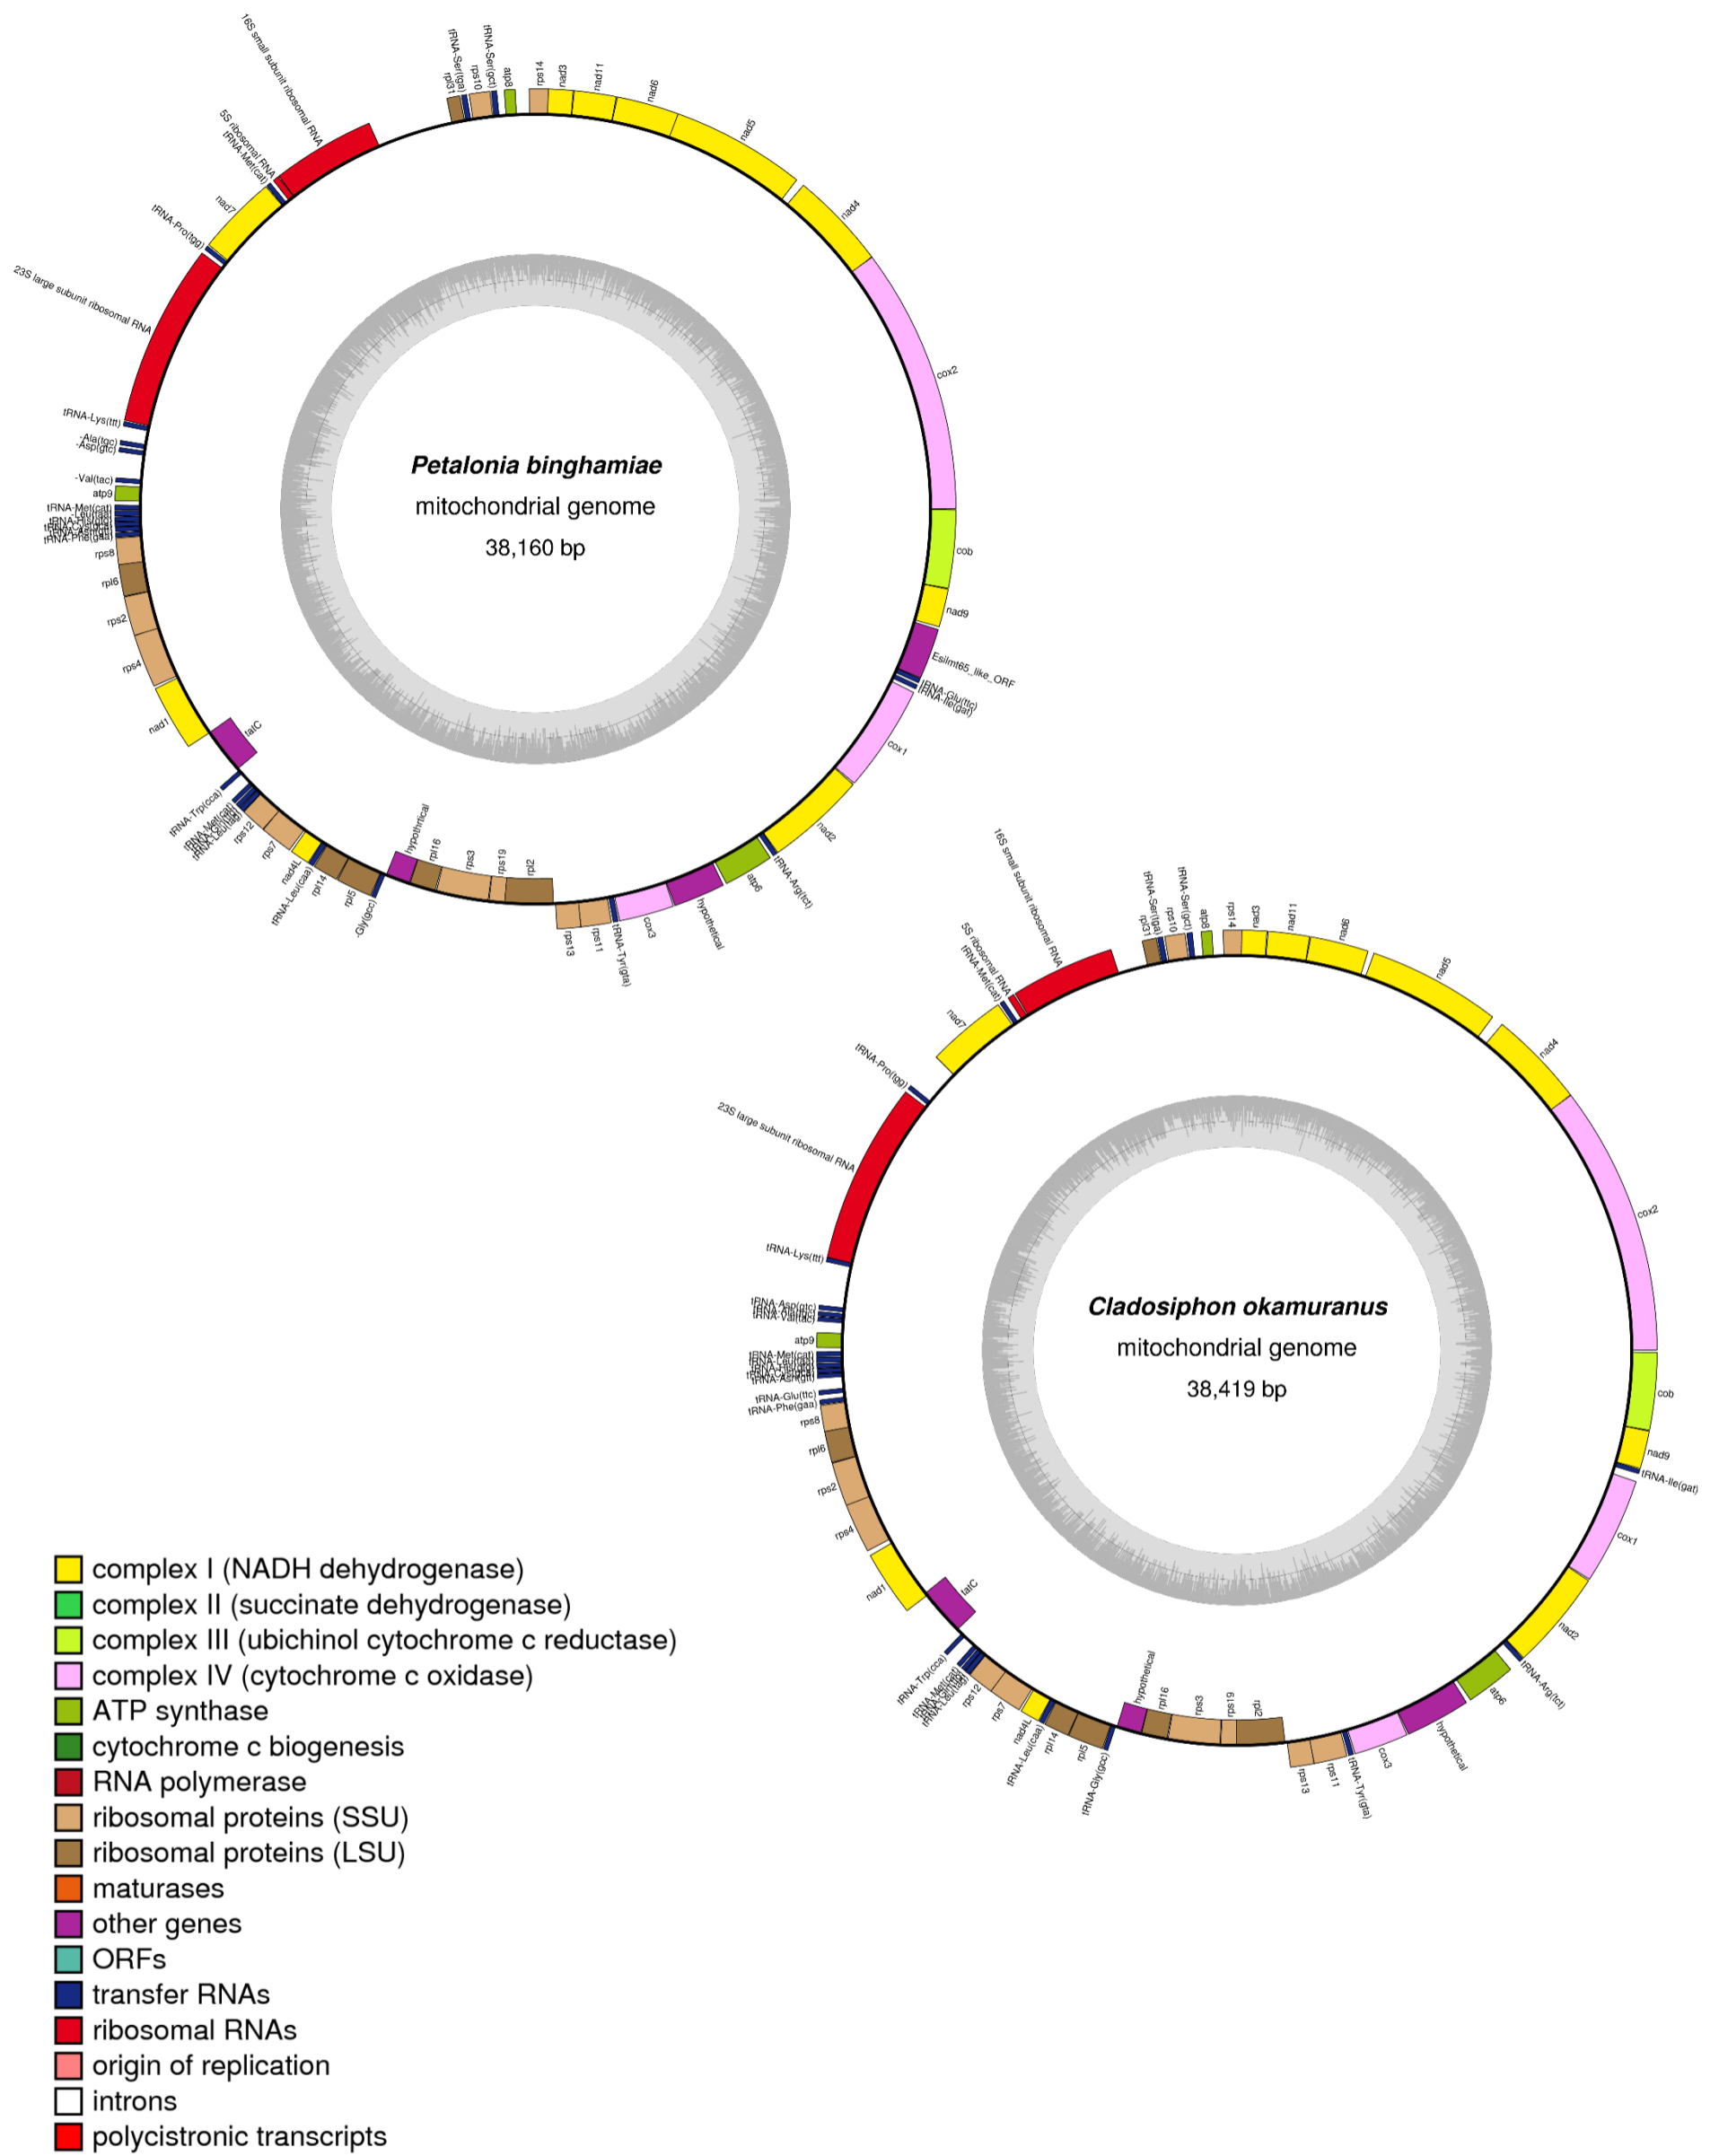

Fig. S3. Circular maps of the mitochondrial genomes of two Ectocarpales species.

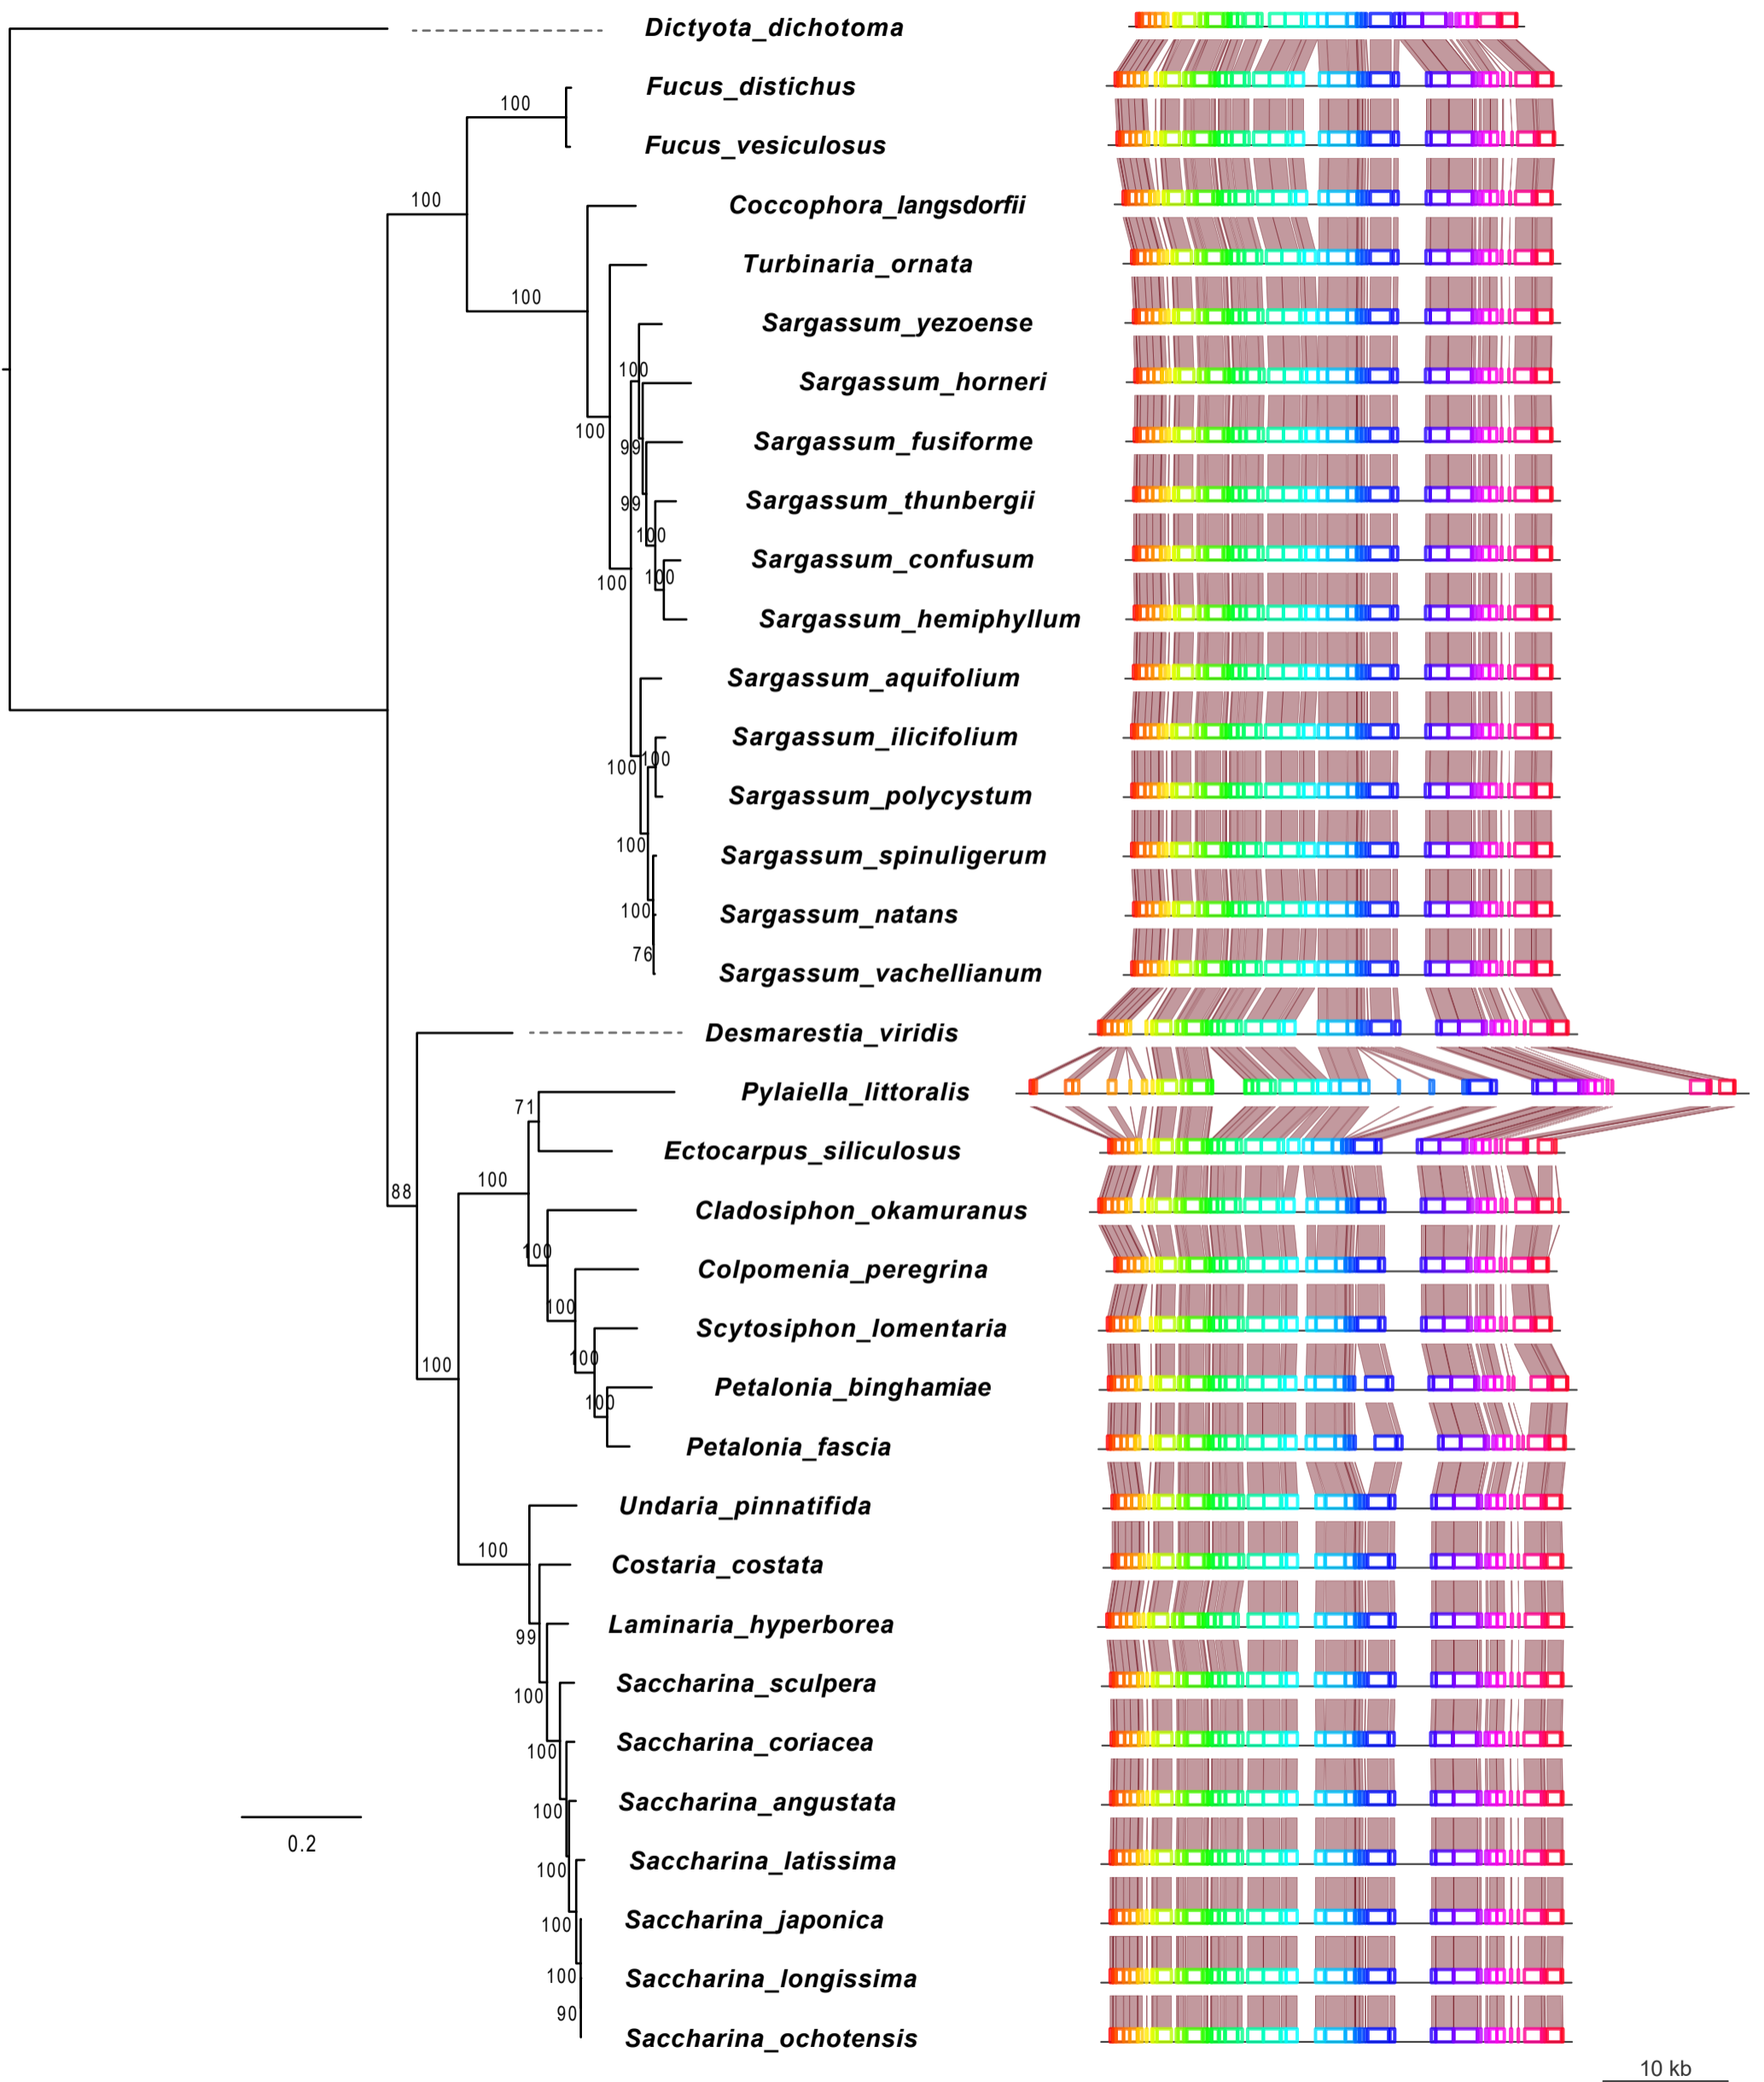

Fig. S4. Co-linear alignment and phylogeny-based clustering of mtDNAs of 32 brown algal species

**Table. S1. Plastid genome sequencing statistics**

|                              | <i>Scytosiphon canaliculatus</i> | <i>Scytosiphon promiscuus</i> (♂) | <i>Scytosiphon promiscuus</i> (♀) | <i>Petalonia binghamiae</i> | <i>Ectocarpus siliculosus</i> (♂) | <i>Cladosiphon okamuranus</i> <sup>1</sup> |
|------------------------------|----------------------------------|-----------------------------------|-----------------------------------|-----------------------------|-----------------------------------|--------------------------------------------|
| NGS Platform                 | Ion PGM                          | Ion PGM                           | Ion PGM                           | Ion PGM                     | Ion PGM                           | Illumina                                   |
| No. reads                    | 4,066,433                        | 4,511,276                         | 7,604,996                         | 4,232,288                   | 7,659,092                         | 46,686,028                                 |
| Total length (Mb)            | 1,137                            | 1,375                             | 2,781                             | 1,028                       | 2,752                             | 13,916                                     |
| N50 contig (bp) <sup>2</sup> | 2,478                            | 4,860                             | 1,829                             | 3,533                       | 8,679                             | 21,705                                     |
| Average coverage             | 193.5                            | 371.2                             | 494.8                             | 470.9                       | 159.9                             | 99.4                                       |
| Reference                    | This study                       | This study                        | This study                        | This study                  | This study                        | Nishitsuji et al. and this study           |

<sup>1</sup>The whole genome sequencing of *Cladosiphon okamuranus* was conducted in Nishitsuji et al. (2016).

<sup>2</sup>The N50 value was calculated from the merged all assemblies



Table S2. continued

| Functional Categories | Protein Coding Gene | Count | Phaeophyceae                   |                          |                             |                          |                         |                            |                            |                               |                               |                               |                                  |                               |                             |                                |
|-----------------------|---------------------|-------|--------------------------------|--------------------------|-----------------------------|--------------------------|-------------------------|----------------------------|----------------------------|-------------------------------|-------------------------------|-------------------------------|----------------------------------|-------------------------------|-----------------------------|--------------------------------|
|                       |                     |       | Fucales                        |                          |                             |                          | Laminariales            |                            |                            | Ectocarpales                  |                               |                               |                                  | Dictyotales                   |                             |                                |
|                       |                     |       | <i>Coccophora.langsdorffii</i> | <i>Sargassum.horneri</i> | <i>Sargassum.thunbergii</i> | <i>Fucus.vesiculosus</i> | <i>Costaria.costata</i> | <i>Saccharina.japonica</i> | <i>Undaria.pinnatifida</i> | <i>Pleurocladia.lacustris</i> | <i>Ectocarpus.siliculosus</i> | <i>Cladophoron.okamuranus</i> | <i>Scytosiphon.canaliculatus</i> | <i>Scytosiphon.lomentaria</i> | <i>Petalonia.binghamiae</i> | <i>Dictyopteris.divaricata</i> |
| Photosystem II        | psbA                | 14    |                                |                          |                             |                          |                         |                            |                            |                               |                               |                               |                                  |                               |                             |                                |
|                       | psbB                | 14    |                                |                          |                             |                          |                         |                            |                            |                               |                               |                               |                                  |                               |                             |                                |
|                       | psbC                | 14    |                                |                          |                             |                          |                         |                            |                            |                               |                               |                               |                                  |                               |                             |                                |
|                       | psbD                | 14    |                                |                          |                             |                          |                         |                            |                            |                               |                               |                               |                                  |                               |                             |                                |
|                       | psbE                | 14    |                                |                          |                             |                          |                         |                            |                            |                               |                               |                               |                                  |                               |                             |                                |
|                       | psbF                | 14    |                                |                          |                             |                          |                         |                            |                            |                               |                               |                               |                                  |                               |                             |                                |
|                       | psbH                | 14    |                                |                          |                             |                          |                         |                            |                            |                               |                               |                               |                                  |                               |                             |                                |
|                       | psbI                | 14    |                                |                          |                             |                          |                         |                            |                            |                               |                               |                               |                                  |                               |                             |                                |
|                       | psbJ                | 13    |                                |                          |                             |                          |                         |                            |                            |                               |                               |                               |                                  |                               |                             |                                |
|                       | psbK                | 14    |                                |                          |                             |                          |                         |                            |                            |                               |                               |                               |                                  |                               |                             |                                |
|                       | psbL                | 14    |                                |                          |                             |                          |                         |                            |                            |                               |                               |                               |                                  |                               |                             |                                |
|                       | psbN                | 14    |                                |                          |                             |                          |                         |                            |                            |                               |                               |                               |                                  |                               |                             |                                |
|                       | psbT                | 14    |                                |                          |                             |                          |                         |                            |                            |                               |                               |                               |                                  |                               |                             |                                |
|                       | psbV                | 14    |                                |                          |                             |                          |                         |                            |                            |                               |                               |                               |                                  |                               |                             |                                |
|                       | psbW                | 14    |                                |                          |                             |                          |                         |                            |                            |                               |                               |                               |                                  |                               |                             |                                |
|                       | psbX                | 14    |                                |                          |                             |                          |                         |                            |                            |                               |                               |                               |                                  |                               |                             |                                |
| psbY                  | 14                  |       |                                |                          |                             |                          |                         |                            |                            |                               |                               |                               |                                  |                               |                             |                                |
| Cytochrome complex    | petA                | 14    |                                |                          |                             |                          |                         |                            |                            |                               |                               |                               |                                  |                               |                             |                                |
|                       | petB                | 14    |                                |                          |                             |                          |                         |                            |                            |                               |                               |                               |                                  |                               |                             |                                |
|                       | petD                | 14    |                                |                          |                             |                          |                         |                            |                            |                               |                               |                               |                                  |                               |                             |                                |
|                       | petF                | 14    |                                |                          |                             |                          |                         |                            |                            |                               |                               |                               |                                  |                               |                             |                                |
|                       | petG                | 14    |                                |                          |                             |                          |                         |                            |                            |                               |                               |                               |                                  |                               |                             |                                |
|                       | petJ                | 14    |                                |                          |                             |                          |                         |                            |                            |                               |                               |                               |                                  |                               |                             |                                |
|                       | petL                | 11    |                                |                          |                             |                          |                         |                            |                            |                               |                               |                               |                                  |                               |                             |                                |
|                       | petM                | 14    |                                |                          |                             |                          |                         |                            |                            |                               |                               |                               |                                  |                               |                             |                                |
|                       | petN                | 14    |                                |                          |                             |                          |                         |                            |                            |                               |                               |                               |                                  |                               |                             |                                |
|                       | ccs1                | 14    |                                |                          |                             |                          |                         |                            |                            |                               |                               |                               |                                  |                               |                             |                                |
| ccsA                  | 14                  |       |                                |                          |                             |                          |                         |                            |                            |                               |                               |                               |                                  |                               |                             |                                |
| Metabolism            | chlI                | 14    |                                |                          |                             |                          |                         |                            |                            |                               |                               |                               |                                  |                               |                             |                                |
|                       | chlB                | 14    |                                |                          |                             |                          |                         |                            |                            |                               |                               |                               |                                  |                               |                             |                                |
|                       | chlL                | 14    |                                |                          |                             |                          |                         |                            |                            |                               |                               |                               |                                  |                               |                             |                                |
|                       | chlN                | 14    |                                |                          |                             |                          |                         |                            |                            |                               |                               |                               |                                  |                               |                             |                                |
|                       | rbcL                | 14    |                                |                          |                             |                          |                         |                            |                            |                               |                               |                               |                                  |                               |                             |                                |
|                       | rbcS                | 14    |                                |                          |                             |                          |                         |                            |                            |                               |                               |                               |                                  |                               |                             |                                |
|                       | thiG                | 14    |                                |                          |                             |                          |                         |                            |                            |                               |                               |                               |                                  |                               |                             |                                |
|                       | thiS (ycf40)        | 14    |                                |                          |                             |                          |                         |                            |                            |                               |                               |                               |                                  |                               |                             |                                |
| Cellular process      | clpC                | 14    |                                |                          |                             |                          |                         |                            |                            |                               |                               |                               |                                  |                               |                             |                                |
|                       | dnaE                | 14    |                                |                          |                             |                          |                         |                            |                            |                               |                               |                               |                                  |                               |                             |                                |
|                       | dnaK                | 14    |                                |                          |                             |                          |                         |                            |                            |                               |                               |                               |                                  |                               |                             |                                |
|                       | ftsH                | 14    |                                |                          |                             |                          |                         |                            |                            |                               |                               |                               |                                  |                               |                             |                                |
|                       | groEL               | 14    |                                |                          |                             |                          |                         |                            |                            |                               |                               |                               |                                  |                               |                             |                                |
|                       | secA                | 14    |                                |                          |                             |                          |                         |                            |                            |                               |                               |                               |                                  |                               |                             |                                |
|                       | secG (ycf47)        | 14    |                                |                          |                             |                          |                         |                            |                            |                               |                               |                               |                                  |                               |                             |                                |
|                       | secY                | 14    |                                |                          |                             |                          |                         |                            |                            |                               |                               |                               |                                  |                               |                             |                                |
|                       | sufB (ycf24)        | 14    |                                |                          |                             |                          |                         |                            |                            |                               |                               |                               |                                  |                               |                             |                                |
|                       | sufC (ycf16)        | 14    |                                |                          |                             |                          |                         |                            |                            |                               |                               |                               |                                  |                               |                             |                                |
|                       | tatC                | 14    |                                |                          |                             |                          |                         |                            |                            |                               |                               |                               |                                  |                               |                             |                                |
|                       | acsF                | 14    |                                |                          |                             |                          |                         |                            |                            |                               |                               |                               |                                  |                               |                             |                                |
|                       | ftrB                | 14    |                                |                          |                             |                          |                         |                            |                            |                               |                               |                               |                                  |                               |                             |                                |
|                       | ilvB                | 14    |                                |                          |                             |                          |                         |                            |                            |                               |                               |                               |                                  |                               |                             |                                |
|                       | ilvH                | 14    |                                |                          |                             |                          |                         |                            |                            |                               |                               |                               |                                  |                               |                             |                                |
| Conserved proteins    | ycf3                | 14    |                                |                          |                             |                          |                         |                            |                            |                               |                               |                               |                                  |                               |                             |                                |
|                       | ycf4                | 14    |                                |                          |                             |                          |                         |                            |                            |                               |                               |                               |                                  |                               |                             |                                |
|                       | ycf12               | 14    |                                |                          |                             |                          |                         |                            |                            |                               |                               |                               |                                  |                               |                             |                                |
|                       | ycf17               | 10    |                                |                          |                             |                          |                         |                            |                            |                               |                               |                               |                                  |                               |                             |                                |
|                       | ycf19               | 14    |                                |                          |                             |                          |                         |                            |                            |                               |                               |                               |                                  |                               |                             |                                |
|                       | ycf33               | 14    |                                |                          |                             |                          |                         |                            |                            |                               |                               |                               |                                  |                               |                             |                                |
|                       | ycf34               | 14    |                                |                          |                             |                          |                         |                            |                            |                               |                               |                               |                                  |                               |                             |                                |
|                       | ycf35               | 14    |                                |                          |                             |                          |                         |                            |                            |                               |                               |                               |                                  |                               |                             |                                |
|                       | ycf37               | 14    |                                |                          |                             |                          |                         |                            |                            |                               |                               |                               |                                  |                               |                             |                                |
|                       | ycf39               | 14    |                                |                          |                             |                          |                         |                            |                            |                               |                               |                               |                                  |                               |                             |                                |
|                       | ycf41               | 14    |                                |                          |                             |                          |                         |                            |                            |                               |                               |                               |                                  |                               |                             |                                |
|                       | ycf42               | 14    |                                |                          |                             |                          |                         |                            |                            |                               |                               |                               |                                  |                               |                             |                                |
|                       | ycf46               | 14    |                                |                          |                             |                          |                         |                            |                            |                               |                               |                               |                                  |                               |                             |                                |
|                       | ycf54               | 10    |                                |                          |                             |                          |                         |                            |                            |                               |                               |                               |                                  |                               |                             |                                |
|                       | ycf65               | 14    |                                |                          |                             |                          |                         |                            |                            |                               |                               |                               |                                  |                               |                             |                                |
|                       | ycf66               | 14    |                                |                          |                             |                          |                         |                            |                            |                               |                               |                               |                                  |                               |                             |                                |
|                       | Escp124_like        | 14    |                                |                          |                             |                          |                         |                            |                            |                               |                               |                               |                                  |                               |                             |                                |
| Escp152_like          | 14                  |       |                                |                          |                             |                          |                         |                            |                            |                               |                               |                               |                                  |                               |                             |                                |
| Total                 | 72                  |       | 139                            | 139                      | 139                         | 139                      | 139                     | 139                        | 139                        | 141                           | 144                           | 144                           | 143                              | 143                           | 144                         | 139                            |
